# Supplementary material for: Dietary Behaviour Is Associated with Cardiometabolic and Psychological Risk Indicators in Female Hospital Nurses—A Post-Hoc, Cross-Sectional Study
Source: PubMed Central journal article supplement (PMC6770286; doi:10.3390/nu11092054), 2019-09-02
Supplement: nutrients-11-02054-s001.pdf [file nutrients-11-02054-s001.pdf]

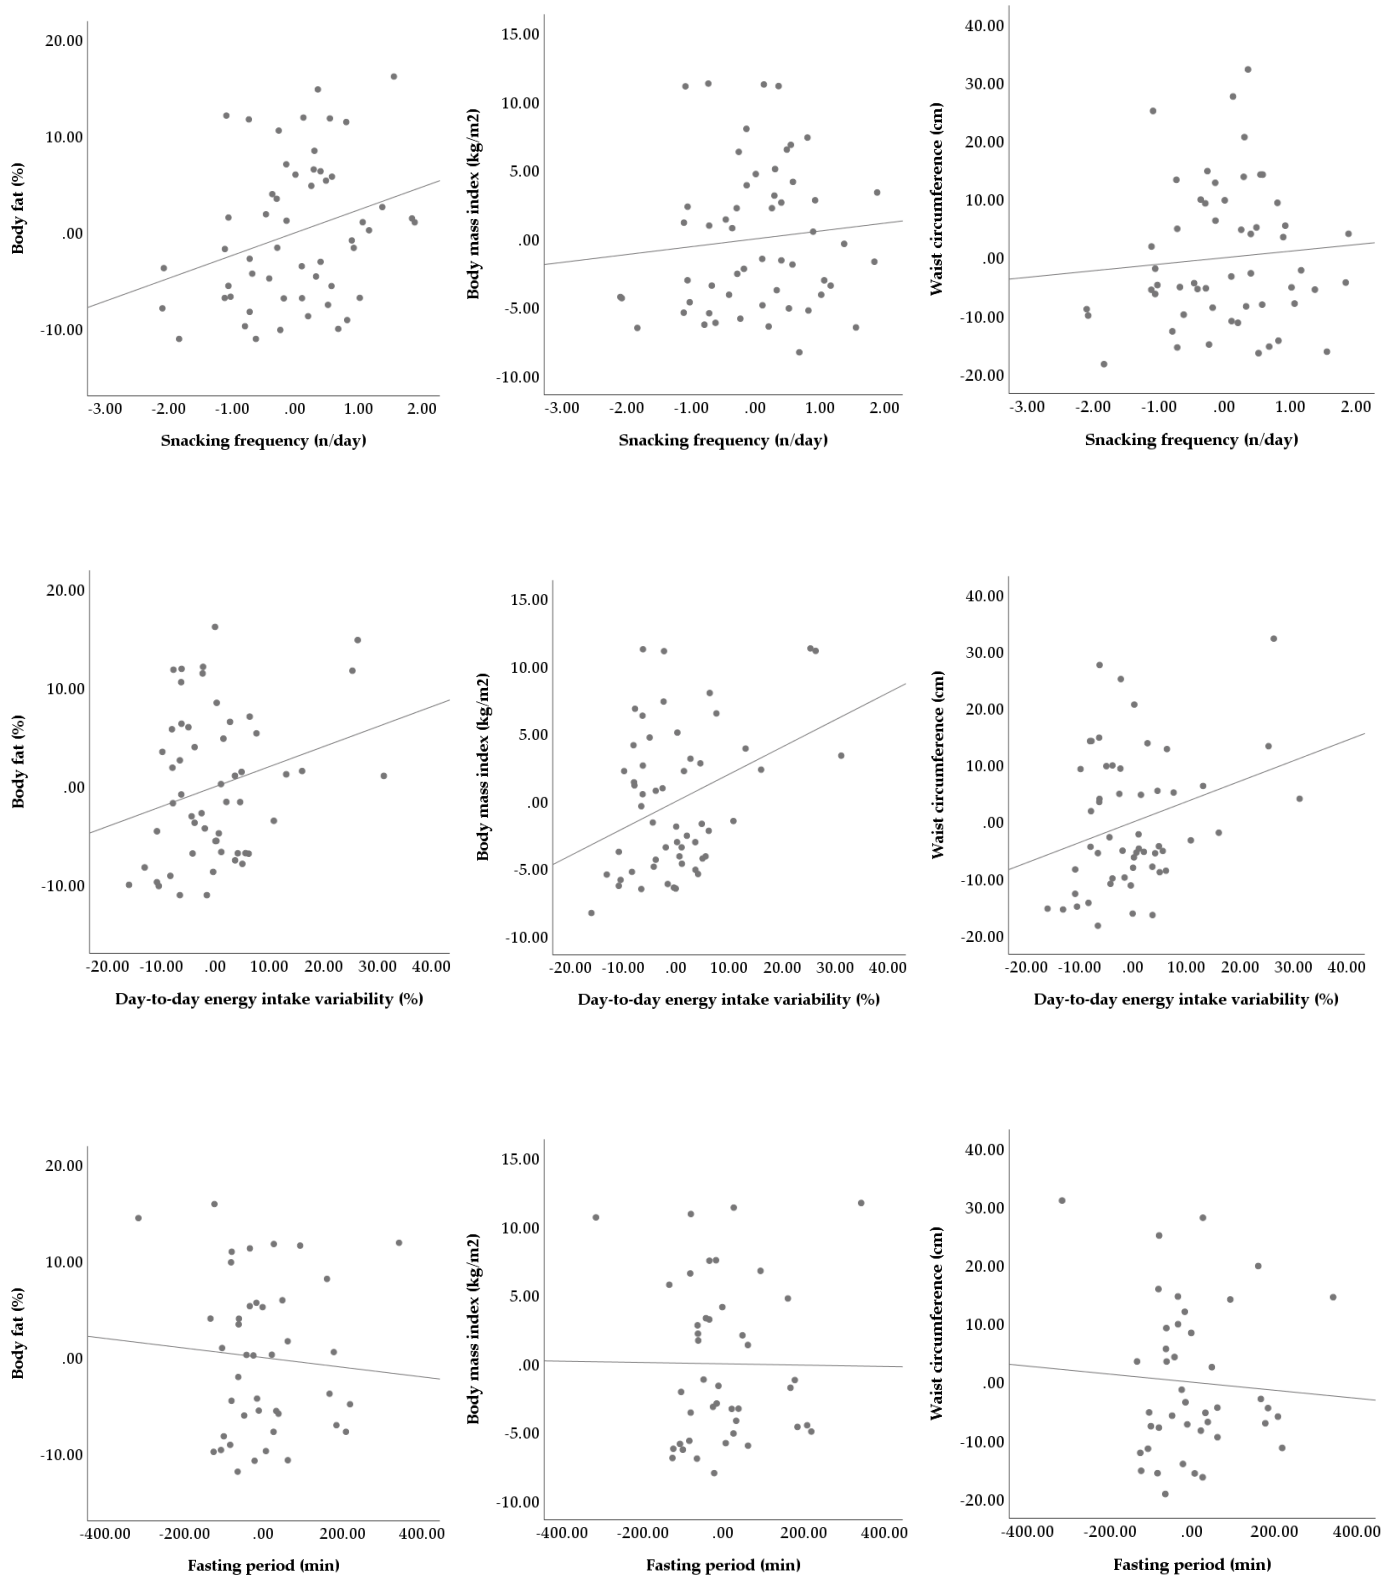

Figure S1. Correlations between dietary behaviours and anthropometric measures. Age and daily caloric intake adjusted data are presented.
